# Supplementary material for: MoS2 nanosheets effectively bind to the receptor binding domain of the SARS-CoV-2 spike protein and destabilize the spike–human ACE2 receptor interactions
Source: Royal Society of Chemistry journal article supplement (doi:10.1039/d2sm01181f), 2022-01-01
Supplement: d2sm01181f1.pdf [file d2sm01181f1.pdf]

## Electronic Supplementary Information

# **MoS<sub>2</sub> nanosheets effectively binds to the receptor binding domain of SARS-CoV-2 spike protein and destabilizes the spike-human ACE2 receptor interactions**

Deepali Bisht<sup>1</sup>, Soumya Lipsa Rath<sup>\*2</sup>, Shounak Roy<sup>1</sup> and Amit Jaiswal<sup>\*1</sup>

<sup>1</sup>School of Biosciences and Bioengineering, Indian Institute of Technology, Mandi,

Kamand-175075, Himachal Pradesh, India.<sup>2</sup>

Department of Biotechnology, National Institute of Technology Warangal (NITW),

Warangal -506004, Telangana, India.

\* Corresponding Author Email: [j.amit@iitmandi.ac.in](mailto:j.amit@iitmandi.ac.in) ; [slrath@nitw.ac.in](mailto:slrath@nitw.ac.in)

**Table S1** Description of the hotspot region of the Spike and ACE2 receptor protein<sup>1</sup>

| <b>Protein</b>            | <b>Hotspot region</b>     | <b>Function</b>                                      |
|---------------------------|---------------------------|------------------------------------------------------|
| <b>Spike glycoprotein</b> | 319-541                   | Receptor binding domain (RBD)                        |
|                           | 437-508                   | Receptor binding motif (RBM)                         |
| <b>ACE2</b>               | 30-42<br>82-84<br>353-357 | SARS-CoV-2 spike glycoprotein interacting amino acid |

**Table S2** List of all the systems for MD simulation

| <b>S. No.</b> | <b>System</b>                | <b>Time (ns)</b> |
|---------------|------------------------------|------------------|
| 1             | RBD-MoS <sub>2</sub> -1      | 100              |
| 2             | RBD-MoS <sub>2</sub> -2      | 200              |
| 3             | ACE2-MoS <sub>2</sub> -1     | 100              |
| 4             | ACE2-MoS <sub>2</sub> -2     | 100              |
| 5             | RBD-ACE2-MoS <sub>2</sub> -1 | 100              |
| 6             | RBD-ACE2-MoS <sub>2</sub> -2 | 100              |
| 7             | RBD-ACE2-MoS <sub>2</sub> -3 | 100              |

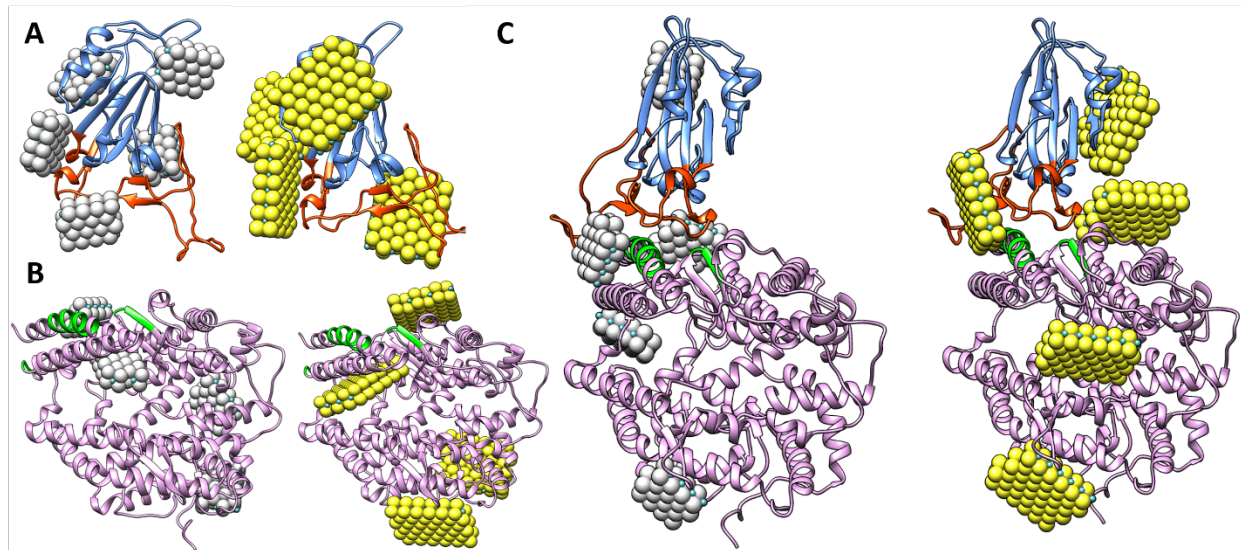

**Figure S1.** Docking conformation of smaller,  $10 \times 10 \times 6$  Å (in white) and larger,  $17 \times 16 \times 6$  Å (in yellow) MoS<sub>2</sub> nanosheets with A) RBD, B) ACE2 and, C) RBD/ACE2 complex.

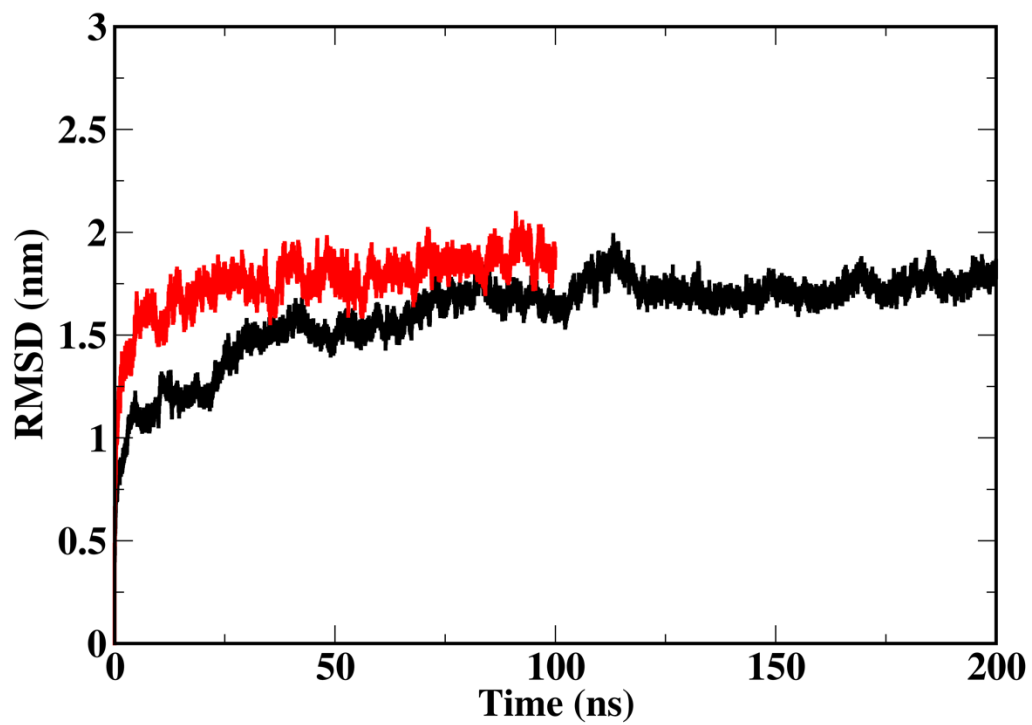

**Figure S2** Time evolution of the RMSD of Spike RBD showing protein stability when bound to MoS<sub>2</sub> nanosheet. (Color: RBD- MoS<sub>2</sub>-1 is shown in red and RBD- MoS<sub>2</sub>-2 is shown in black).

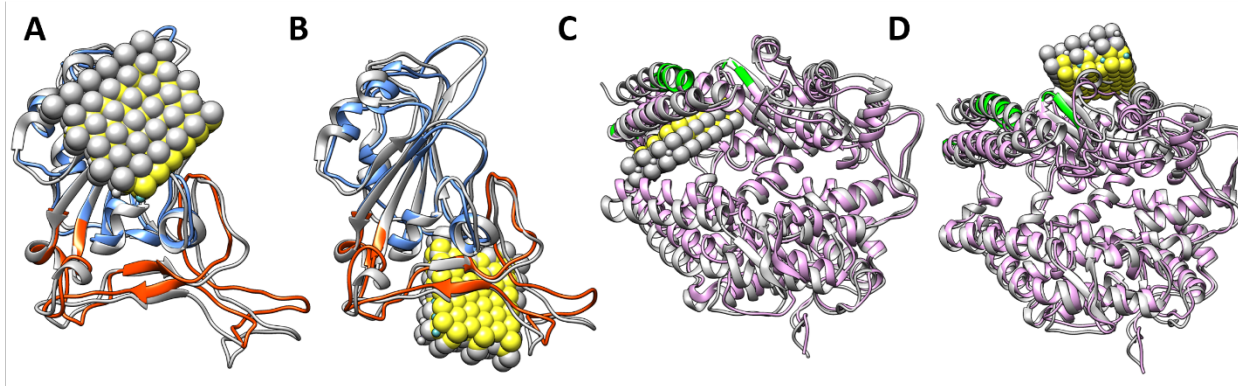

**Figure S3** Superimposed structures of the initial and final conformations of A) RBD-MoS<sub>2</sub>-1 B) RBD-MoS<sub>2</sub>-2 C) ACE2-MoS<sub>2</sub>-1 and, D) ACE2-MoS<sub>2</sub>-2, showing the relative position of protein and larger MoS<sub>2</sub> nanosheet (17×16×6 Å).

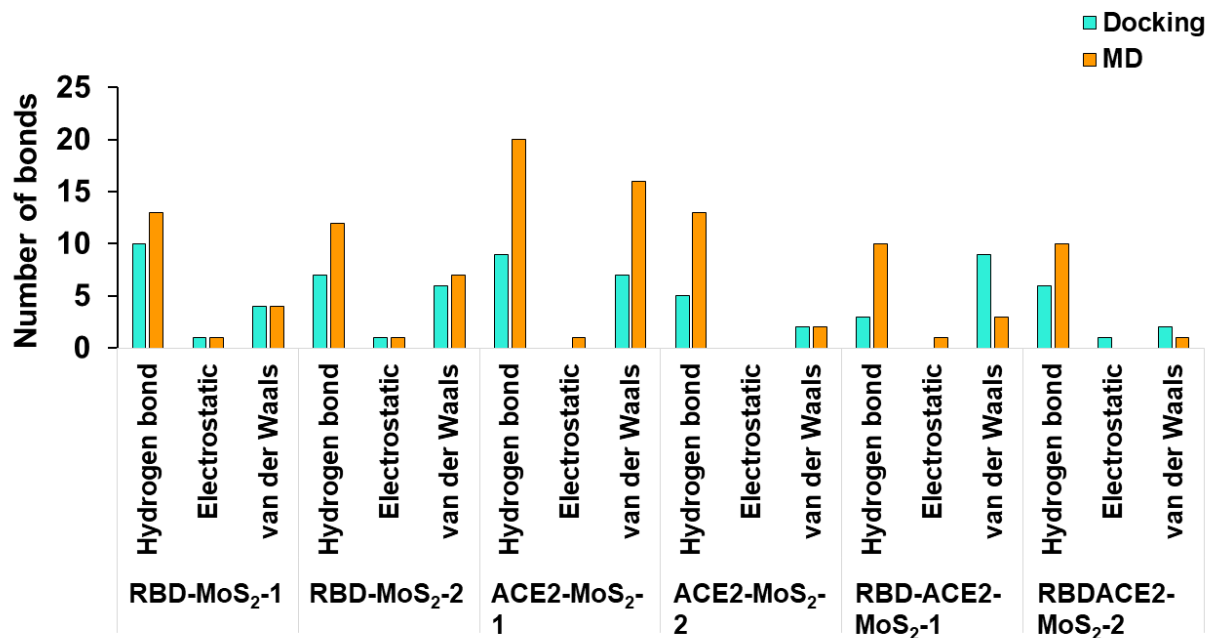

**Figure S4** The total number of Hydrogen bonds, electrostatic and van der Waal's interaction before (in sea-green) and after simulation (in orange).

**Table S3(A)** Interactions in Docking and MD simulation for RBD and MoS<sub>2</sub>\*

| System                  | Nanosheet     | Type of bond  | Docking    |           | MD simulation |             |
|-------------------------|---------------|---------------|------------|-----------|---------------|-------------|
|                         |               |               | Donor      | Acceptor  | Donor         | Acceptor    |
| RBD-MoS <sub>2</sub> -1 | 17×16×6       | hydrogen bond | TYR369:HH  | MD07:S7   | :MD01:S3      | :GLY381:O   |
|                         |               |               | TYR380:HH  | MD06:S7   | :MD03:S3      | :ASP427:O   |
|                         |               |               | GLY381:HN  | MD02:S7   | :MD04:S5      | :CYS379:O   |
|                         |               |               | GLY381:HN  | MD04:S1   | :MD06:S1      | :PRO412:O   |
|                         |               |               | GLY381:HN  | MD05:S3   | :MD06:S1      | :ASP427:O   |
|                         |               |               | GLN414:HE2 | MD06:S5   | :MD06:S5      | :PRO412:O   |
|                         |               |               | 2          |           |               |             |
|                         |               |               | MD01:S5    | GLY381:O  | :MD07:S1      | :CYS379:O   |
|                         |               |               | MD03:S5    | ASP427:O  | :MD09:S5      | :ARG408:O   |
|                         |               |               | MD06:S1    | PRO412:O  | :MD09:S5      | :GLN414:OE1 |
|                         |               |               | MD06:S5    | PRO412:O  | :LYS378:HZ3   | :MD08:S7    |
|                         |               |               |            |           | :GLY381:HN    | :MD01:S5    |
|                         |               |               |            |           | :GLY381:HN    | :MD02:S7    |
|                         |               |               |            |           | :GLY381:HN    | :MD04:S1    |
|                         | metallic      | MD06:MO2      | PRO412:O   | :MD09:MO2 | :GLN414:OE1   |             |
|                         | pi-donor      | MD05:S5       | TYR380     |           |               |             |
|                         | hydrogen bond |               |            |           |               |             |
|                         | sulfur-x      | MD05:S1       | TYR380     | :MD03:S7  | :ASP427:O     |             |
|                         | pi-sulfur     | MD06:S3       | TYR380     | :MD05:S3  | :TYR380       |             |
|                         |               | MD06:S5       | TYR380     | :MD05:S5  | :TYR380       |             |
|                         |               |               |            | :MD08:S1  | :TYR380       |             |
| RBD-MoS <sub>2</sub> -2 | 17×16×6       | hydrogen      | THR470:HG1 | MD01:S5   | :MD02:S1      | :TYR351:OH  |

|           |           |           |            |             |
|-----------|-----------|-----------|------------|-------------|
|           | GLU484:HN | MD07:S3   | :MD02:S3   | :THR470:OG1 |
|           | MD04:S3   | GLY482:O  | :MD03:S3   | :TYR351:OH  |
|           | MD04:S7   | GLY482:O  | :MD03:S5   | :SER349:OG  |
|           | MD06:S5   | TYR449:O  | :MD04:S1   | :THR470:O   |
|           | MD07:S1   | GLU484:OE | :MD04:S3   | :GLY482:O   |
|           |           | 2         |            |             |
|           | MD07:S7   | GLU484:O  | :MD04:S7   | :GLY482:O   |
|           |           |           | :MD06:S5   | :TYR451:O   |
|           |           |           | :MD07:S5   | :GLU484:OE2 |
|           |           |           | :MD08:S3   | :GLU484:OE2 |
|           |           |           | :SER349:HG | :MD03:S1    |
|           |           |           | :GLU484:HN | :MD07:S3    |
| metallic  | MD06:MO2  | TYR449:O  | :MD06:MO2  | :TYR449:O   |
| pi-donor  |           |           | :MD05:S5   | :PHE490     |
| hydrogen  |           |           |            |             |
| bond      |           |           |            |             |
| pi-sulfur | MD02:S7   | PHE490    | :MD02:S1   | :TYR351     |
|           | MD03:S3   | TYR351    | :MD02:S5   | :TYR351     |
|           | MD04:S1   | PHE490    | :MD03:S3   | :TYR351     |
|           | MD05:S1   | PHE490    | :MD03:S5   | :TYR351     |
|           | MD05:S7   | PHE490    | :MD05:S7   | :PHE490     |
|           | MD09:S5   | TYR449    | :MD09:S5   | :TYR449     |

\*MD0X: here MD=MoS<sub>2</sub>, 0X=0 chain number



**Table S3(B)** Interactions in Docking and MD simulation for ACE2 and MoS<sub>2</sub>\*

| System                   | Nanosheet | Type of bond  | Docking     |                  | MD simulation |            |
|--------------------------|-----------|---------------|-------------|------------------|---------------|------------|
|                          |           |               | Donor       | Acceptor         | Donor         | Acceptor   |
| ACE2-MoS <sub>2</sub> -1 | 17×16×6   | hydrogen bond | SER47:HG    | MD04:S8          | : MD01:S2     | : ASN63:O  |
|                          |           |               | SER70:HG    | MD02:S8          | : MD01:S4     | : MET62:O  |
|                          |           |               | SER106:HN   | MD03:S5          | : MD01:S4     | : ASN63:O  |
|                          |           |               | ASN117:HD22 | MD02:S1          | :MD02:S2      | :ASP67:OD1 |
|                          |           |               | ASP350:HN   | MD07:S8          | :MD03:S1      | :SER105:O  |
|                          |           |               | MD01:S6     | ASP67:OD<br>1    | :MD03:S6      | :SER106:OG |
|                          |           |               | MD07:S7     | ALA348:O         | :MD04:S4      | :SER47:OG  |
|                          |           |               | MD08:S5     | A:ASN394<br>:OD1 | :MD07:S3      | :ALA348:O  |
|                          |           |               | MD09:S8     | LEU391:O         | :MD07:S4      | :ALA348:O  |
|                          |           |               |             |                  | :MD07:S7      | :ALA348:O  |
|                          |           |               |             |                  | :MD07:S8      | :ALA348:O  |
|                          |           |               |             |                  | :MD09:S6      | :LEU391:O  |
|                          |           |               |             |                  | :SER43:HG     | :MD01:S8   |
|                          |           |               |             |                  | :SER43:HG     | :MD04:S4   |
|                          |           | :TRP69:HE1    | :MD05:S4    |                  |               |            |
|                          |           | :TRP69:HE1    | :MD05:S8    |                  |               |            |
|                          |           | :ASN117:HD21  | :MD02:S1    |                  |               |            |
|                          |           | :ASN117:HD22  | :MD03:S3    |                  |               |            |
|                          |           | :ASP350:HN    | :MD07:S4    |                  |               |            |
|                          |           | :ASN394:HD21  | :MD08:S7    |                  |               |            |
|                          |           | :MD03:MO2     | :SER106:OG  |                  |               |            |
|                          |           | metallic      |             |                  |               |            |

---

|                               |                |           |             |          |            |             |
|-------------------------------|----------------|-----------|-------------|----------|------------|-------------|
|                               |                | pi-sulfur | MD05:S4     | TRP69    | :MD04:S2   | :TRP69      |
|                               |                |           | MD05:S6     | TRP69    | :MD04:S3   | :TRP349     |
|                               |                |           | MD07:S6     | PHE40    | :MD04:S4   | :TRP349     |
|                               |                |           | MD08:S2     | TRP69    | :MD04:S6   | :PHE40      |
|                               |                |           | MD08:S2     | TRP69    | :MD04:S6   | :TRP69      |
|                               |                |           | MD08:S4     | PHE40    | :MD04:S8   | :PHE40      |
|                               |                |           |             |          | :MD04:S8   | :TRP349     |
|                               |                |           |             |          | :MD04:S8   | :TRP349     |
|                               |                |           |             |          | :MD05:S8   | :TRP69      |
|                               |                |           |             |          | :MD05:S8   | :TRP69      |
|                               |                |           |             |          | :MD07:S4   | :PHE40      |
|                               |                |           |             |          | :MD08:S2   | :TRP69      |
|                               |                |           |             |          | :MD08:S2   | :TRP69      |
|                               |                |           |             |          | :MD08:S2   | :PHE390     |
|                               |                |           |             |          | :MD08:S4   | :PHE390     |
|                               |                |           |             |          | :MD08:S6   | :PHE390     |
|                               |                | sulfur-x  | MD02:S8     | SER70:OG |            |             |
| <b>ACE2-MoS<sub>2</sub>-2</b> | <b>17×16×6</b> | hydrogen  | ASN322:HD21 | MD06:S5  | :MD01:S3   | :ALA384:O   |
|                               |                |           | ASN322:HD21 | MD09:S1  | :MD03:S1   | :THR548:O   |
|                               |                |           | GLN325:HN   | MD08:S5  | :MD03:S5   | :GLY319:O   |
|                               |                |           | GLN325:HN   | MD08:S7  | :MD04:S3   | :MET383:O   |
|                               |                |           | MD07:S7     | LYS353:O | :MD06:S5   | :ASN322:OD1 |
|                               |                |           |             |          | :MD07:S7   | :GLN325:OE1 |
|                               |                |           |             |          | :MD07:S7   | :GLY354:O   |
|                               |                |           |             |          | :MD07:S8   | :GLN325:OE1 |
|                               |                |           |             |          | :MD08:S1   | :ASN322:O   |
|                               |                |           |             |          | :MD08:S5   | :MET323:O   |
|                               |                |           |             |          | :ASN322:HN | :MD05:S5    |

---

|  |           |         |        |            |          |
|--|-----------|---------|--------|------------|----------|
|  |           |         |        | :ASN322:HN | :MD06:S7 |
|  |           |         |        | :GLN325:HN | :MD07:S5 |
|  | pi-sulfur | MD01:S1 | PHE555 | :MD01:S3   | :PHE555  |
|  |           | MD01:S5 | PHE555 | :MD02:S3   | :PHE555  |

\*MD0X: here MD=MoS<sub>2</sub>, 0X=0 chain number

**Table S3(C)** Interaction in Docking and MD simulation for RBD/ACE2 complex and MoS<sub>2</sub>\*

| Protein name                     | Nanosheet | Type of bond | Docking   |           | MD simulation |             |
|----------------------------------|-----------|--------------|-----------|-----------|---------------|-------------|
|                                  |           |              | Donor     | Acceptor  | Donor         | Acceptor    |
| RBD-ACE2-<br>MoS <sub>2</sub> -1 | 17×16×6   |              | CYS344:HN | MD03:S7   | A:TRP349:HE1  | X:MD03:S5   |
|                                  |           |              | MD03:S5   | ALA342:O  | A:VAL404:HN   | X:MD07:S3   |
|                                  |           |              | MD06:S1   | CYS344:SG | A:GLY405:HN   | X:MD07:S7   |
|                                  |           | hydrogen     |           |           | A:ARG518:HH12 | X:MD04:S8   |
|                                  |           |              |           |           | A:GLN522:HE21 | X:MD07:S8   |
|                                  |           | bond         |           |           | X:MD03:S1     | A:ASN51:OD1 |
|                                  |           |              |           |           | X:MD06:S1     | A:PRO346:O  |
|                                  |           |              |           |           | X:MD06:S5     | A:PRO346:O  |
|                                  |           |              |           |           | X:MD07:S4     | A:GLU402:O  |
|                                  |           | metallic     |           |           | X:MD07:S7     | A:GLY405:O  |
|                                  |           |              |           |           | X:MD03:MO1    | A:ASN51:OD1 |
|                                  |           |              |           |           |               |             |
|                                  |           | pi-donor     |           |           |               |             |
|                                  |           |              |           |           |               |             |
| hydrogen                         |           |              |           |           |               |             |
|                                  |           |              | X:MD03:S3 | A:TRP349  |               |             |
| bond;pi-sulfur                   |           |              |           |           |               |             |
|                                  |           |              |           |           |               |             |
| pi-donor                         |           |              |           |           |               |             |
|                                  |           |              |           |           |               |             |
| hydrogen                         |           | MD07:S8      | PHE274    | MD03:S3   | TRP349        |             |
|                                  |           |              |           |           |               |             |
| bond                             |           |              |           |           |               |             |
|                                  |           |              |           |           |               |             |

|                          |            |            |             |              |
|--------------------------|------------|------------|-------------|--------------|
| pi-sulfur                | MD01:S4    | TYR127     | MD03:S1     | TRP48        |
|                          | MD01:S4    | PHE504     | MD09:S7     | HIS374       |
|                          | MD01:S7    | PHE504     |             |              |
|                          | MD01:S8    | TYR127     |             |              |
|                          | MD04:S5    | HIS345     |             |              |
|                          | MD05:S3    | HIS345     |             |              |
|                          | MD05:S7    | HIS345     |             |              |
|                          | MD07:S7    | PHE274     |             |              |
| hydrogen                 | ASN322:HD2 |            |             |              |
| bond                     | 2          | MD04:S1    | A:ASN322:HN | X:MD02:S7    |
|                          | MD01:S1    | GLN325:OE1 | A:ASN322:HN | X:MD02:S5    |
|                          | MD03:S5    | MET383:O   | X:MD01:S1   | A:MET323:O   |
|                          | MD09:S1    | GLY319:O   | X:MD01:S1   | A:GLN325:OE1 |
|                          | MD09:S3    | GLY319:O   | X:MD02:S3   | A:MET323:O   |
|                          | MD09:S5    | GLN552:OE1 | X:MD02:S1   | A:ASN322:O   |
|                          |            |            | X:MD02:S5   | A:ASN322:O   |
|                          |            |            |             | A:ASN322:OD  |
| <b>RBD-ACE2-</b>         |            |            | X:MD04:S1   | 1            |
| <b>MoS<sub>2</sub>-2</b> |            |            | X:MD05:S5   | A:LEU320:O   |
|                          |            |            | X:MD09:S1   | A:GLN552:OE1 |
| metallic                 | MD09:MO2   | GLN552:OE1 |             |              |
| pi-donor                 |            |            |             |              |
| hydrogen                 | MD06:S5    | PHE555     | X:MD06:S5   | A:PHE555     |
| bond;pi-                 |            |            |             |              |
| sulfur                   |            |            |             |              |
| (pi-sulfur)              | MD03:S1    | PHE356     |             |              |

\*MD0X: here MD=MoS<sub>2</sub>, 0X=0 chain number

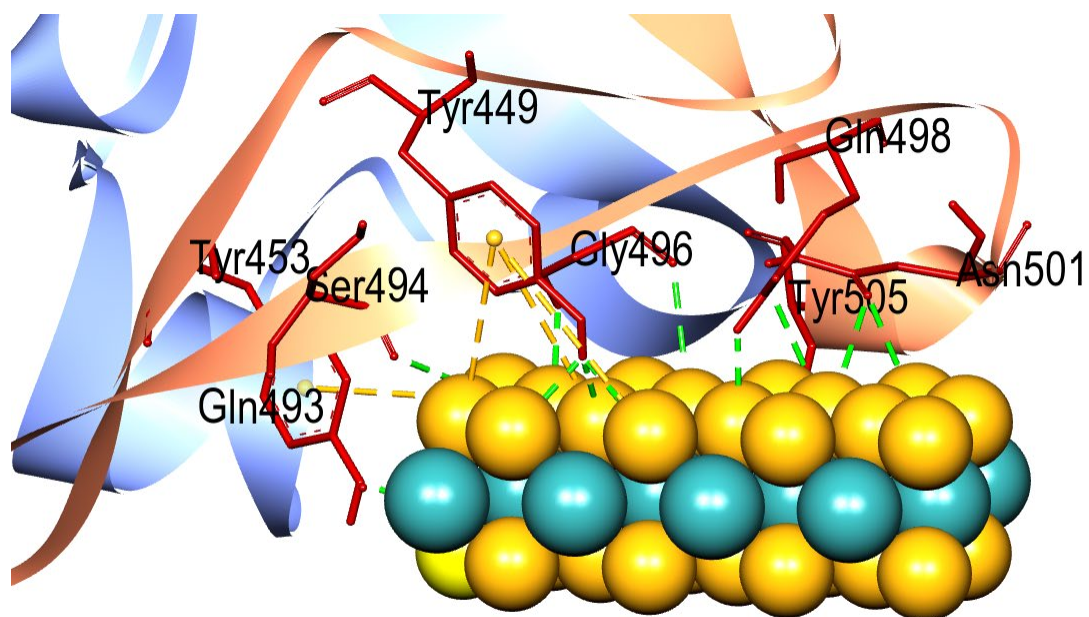

**Figure S5.** Interacting amino acid residues of RBD with smaller the MoS<sub>2</sub> nanosheet (10×10×6 Å). MoS<sub>2</sub> is shown in spheres where Mo is shown in teal and S in yellow colors. Amino acid residues are labelled. Dashed Green lines- Hydrogen bonds; Dashed Yellow lines - van der Waal's interactions.

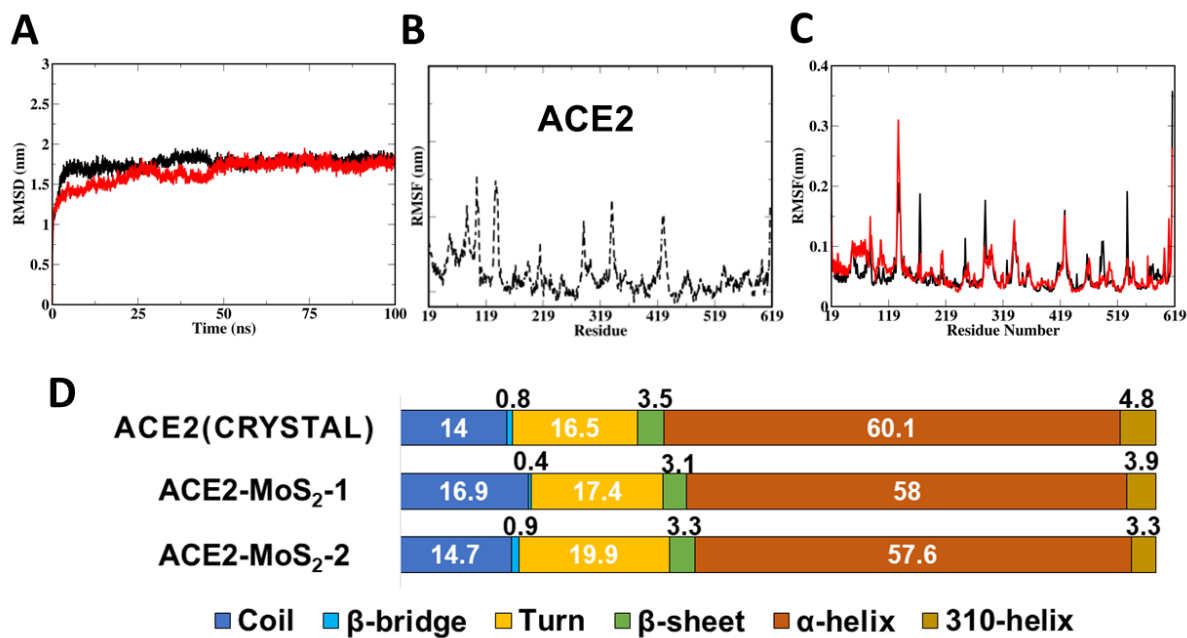

**Figure S6** A) Time evolution of RMSD of human ACE2 receptor bound to larger MoS<sub>2</sub> nanosheet (17×16×6 Å) and its corresponding B) Atomic fluctuation of C $\alpha$  atoms of ACE2 from the crystal structure 6M0J C) Root Mean Square Fluctuations (RMSF) of system ACE2-MoS<sub>2</sub>-1 and ACE2-MoS<sub>2</sub>-2 (color: ACE2-MoS<sub>2</sub>-1 in black ACE2-MoS<sub>2</sub>-2 in red) C) Distribution of secondary structure elements in different ACE2 complexes.

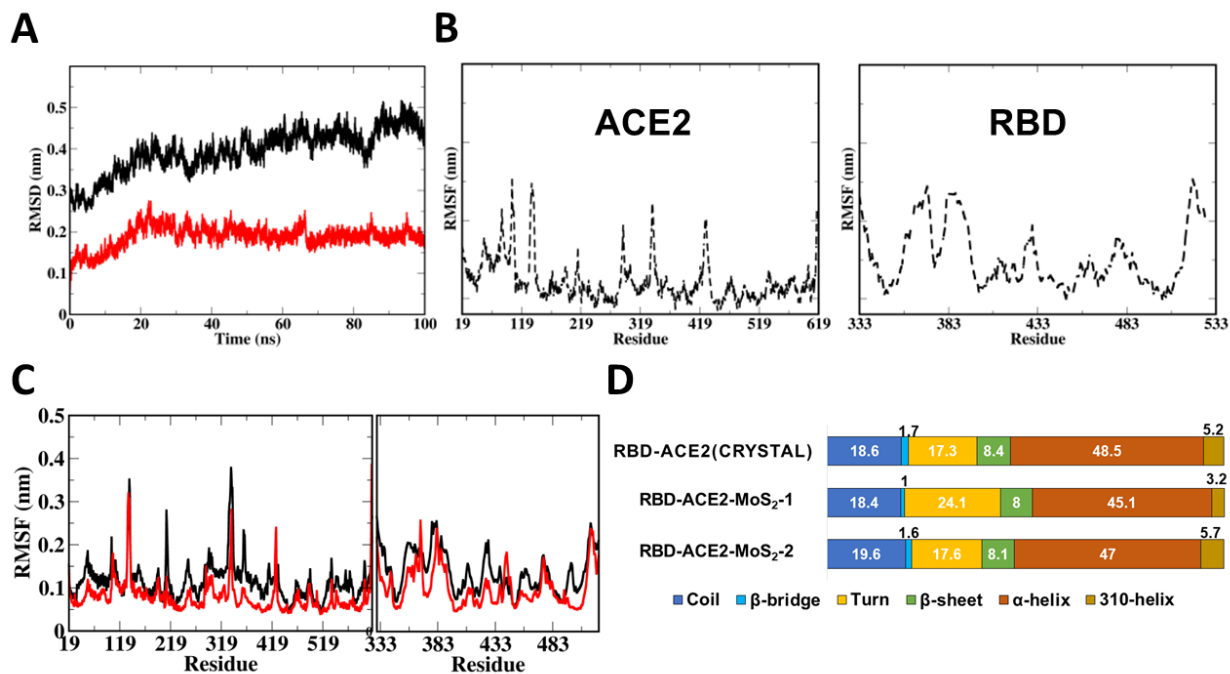

**Figure S7** A) Time evolution of RMSD of RBD/ACE2 complex bound to larger MoS<sub>2</sub> nanosheet (17×16×6 Å) and its corresponding B) Atomic fluctuation of C $\alpha$  atoms of RBD-ACE2 from the crystal structure 6M0J C) Root Mean Square Fluctuations (RMSF) of system RBD-ACE2-MoS<sub>2</sub>-1 and RBD-ACE2-MoS<sub>2</sub>-2 (color: RBD-ACE2-MoS<sub>2</sub>-1 in black and RBD-ACE2-MoS<sub>2</sub>-2 in red) D) The distribution of secondary structure elements in different RBD-ACE2 systems after simulation.

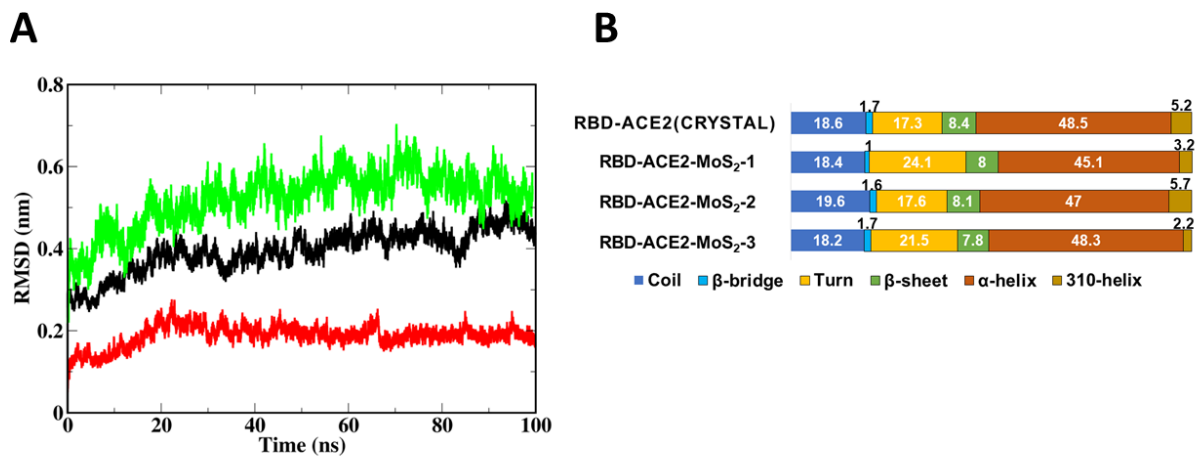

**Figure S8** A) The time evolution of RMSD of RBD/ACE2 complex bound to larger MoS<sub>2</sub> nanosheet (17×16×6 Å) (color: RBD-ACE2-MoS<sub>2</sub>-1 in black; RBD-ACE2-MoS<sub>2</sub>-2 in red and RBD-ACE2-MoS<sub>2</sub>-3 in green) and the distribution of B) secondary structure elements in the three RBD-ACE2 systems considered for the study.



## MATERIALS AND METHODS

The docking studies were performed using AutoDock which uses semi empirical method which evaluates the binding in two steps. In step one, the energy is estimated from the unbound to bound state and the second step involves the calculation of intermolecular energetics of protein and ligand.

$$\Delta G = (V_{bound}^{L-L} - V_{unbound}^{L-L}) + (V_{bound}^{P-P} - V_{unbound}^{P-P}) + (V_{bound}^{P-L} - V_{unbound}^{P-L} + \Delta S_{conf})$$

$$V = W_{vdw} \sum_{i,j} \left( \frac{A_{ij}}{r_{ij}^{12}} - \frac{B_{ij}}{r_{ij}^6} \right) + W_{hbond} \sum_{i,j} E(t) \left( \frac{C_{ij}}{r_{ij}^{12}} - \frac{D_{ij}}{r_{ij}^{10}} \right) + W_{elec} \sum_{i,j} \frac{q_i q_j}{e(r_{ij}) r_{ij}} + W_{sol} \sum_{i,j} (S_i V_j + S_j V_i) e^{(-r_{ij}^2 / 2\sigma^2)}$$

Here, L refers to the “ligand” and P refers to the “protein” in a ligand-protein docking calculation.

Further details can be found in the user manual of Autodock which is freely available<sup>2</sup>.

## References

1. Unal, M. A.; Bayrakdar, F.; Nazir, H.; Besbinar, O.; Gurcan, C.; Lozano, N.; Arellano, L. M.; Yalcin, S.; Panatli, O.; Celik, D., Graphene Oxide Nanosheets Interact and Interfere with SARS-CoV-2 Surface Proteins and Cell Receptors to Inhibit Infectivity. *Small* **2021**, *17* (25), 2101483.
2. User Guide, AutoDock Version 4.2, [https://autodock.scripps.edu/wp-content/uploads/sites/56/2021/10/AutoDock4.2.6\\_UserGuide.pdf](https://autodock.scripps.edu/wp-content/uploads/sites/56/2021/10/AutoDock4.2.6_UserGuide.pdf)
